## Journal Pre-proof

Reversal of propofol-induced depression of the hypoxic ventilatory response by BK-channel blocker ENA-001: a randomized controlled trial

Simone C Jansen, MD, Maarten van Lemmen, BSc, Erik Olofsen, PhD, Laurence Moss, MD, Joseph V Pergolizzi, MD, Thomas Miller, PhD, Robert D Colucci, Pharm D, Monique van Velzen, PhD, Philip Kremer, MD PhD, Albert Dahan, MD PhD, Rutger van der Schrier, MD PhD, Marieke Niesters, MD PhD.

DOI: <https://doi.org/10.1097/ALN.0000000000004915>

To appear in: Anesthesiology

Submitted for publication: August 30, 2023

Accepted for publication: January 11, 2024

Please cite this article as: Jansen SC, van Lemmen M, Olofsen E, Moss L, Pergolizzi JV, Miller T, Colucci RD, van Velzen M, Kremer P, Dahan A, van der Schrier R, Niesters M: Reversal of propofol-induced depression of the hypoxic ventilatory response by BK-channel blocker ENA-001: a randomized controlled trial. Anesthesiology. 2024; <https://doi.org/10.1097/ALN.0000000000004915>

This is a PDF file of an article that has undergone enhancements after acceptance, such as the addition of a cover page and metadata, and formatting for readability, but it is not yet the definitive version of record. This version will undergo additional copyediting, typesetting and review before it is published in its final form, but we are providing this version to give early visibility of the article. Please note that, during the production process, errors may be discovered which could affect the content, and all legal disclaimers that apply to the journal pertain.

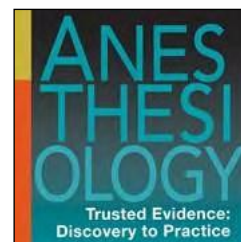

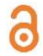

Anesthesiology Publish Ahead of Print

DOI: 10.1097/ALN.0000000000004915

**Reversal of propofol-induced depression of the hypoxic ventilatory response by BK-channel blocker ENA-001: a randomized controlled trial**

Simone C Jansen MD,<sup>1</sup> Maarten van Lemmen BSc,<sup>1</sup> Erik Olofsen PhD,<sup>1</sup> Laurence Moss MD,<sup>2</sup> Joseph V Pergolizzi Jr MD,<sup>3,4</sup> Thomas Miller PhD,<sup>3,5</sup> Robert D Colucci Pharm D,<sup>4,6</sup> Monique van Velzen PhD,<sup>1</sup> Philip Kremer MD PhD,<sup>2</sup> Albert Dahan MD PhD,<sup>1,7</sup> Rutger van der Schrier MD PhD,<sup>1</sup> Marieke Niesters MD PhD<sup>1,7</sup>

1. Department of Anesthesiology, Leiden University Medical Center, Leiden, the Netherlands; 2. Centre for Human Drug Research, Leiden, the Netherlands; 3. Enalare Therapeutics Inc., Princeton, New Jersey, USA; 4. NEMA Research Inc., Naples, Florida, USA; 5. Department of Pediatrics, Sidney Kimmel Medical College, Thomas Jefferson University, Philadelphia, Pennsylvania, USA; 6. Colucci & Associates, LLC, Newton, Connecticut, USA; 7. PainLess Foundation, Leiden, the Netherlands

**Corresponding Author:** Dr. Albert Dahan, Department of Anesthesiology, Leiden University Medical Center, Albinusdreef 2, 2333 ZA Leiden, the Netherlands; email [a.dahan@lumc.nl](mailto:a.dahan@lumc.nl), phone +31715262301

**Word count:** Abstract 260/300, Introduction 334/500, Discussion 1186/1500.

**Support:** Financial support was obtained from institutional/departmental sources and from Centre of Human Drug Research, Leiden, the Netherlands.

The article processing charge was funded by the Open Access Team of Leiden University.

**Conflicts:** In the last 36 months, AD received consultancy fees from Enalare Therapeutics Inc. (USA), Trevena Inc. (USA), and awards/grants from the US Food and Drug Administration and from the Dutch Research Council (NWO, the Hague, the Netherlands) in the framework of the NWA-ORC Call for research project TAPTOE, Tackling and preventing the opioid epidemic (NWA.1160.18.300). JVP and TM are employees of Enalare, Therapeutics Inc., Princeton, New Jersey, USA.

**Registration:** The trial was registered in the trial register of the Dutch Cochrane Center under identifier NL9692 (currently available at [clinicaltrialregister.nl](http://clinicaltrialregister.nl); registration date August 22, 2021) with Dr. G.J. Groeneveld as principle investigator.

This is an open access article distributed under the Creative Commons Attribution License 4.0 (CCBY), which permits unrestricted use, distribution, and reproduction in any medium, provided the original work is properly cited

## Abstract

**Background:** The use of anesthetics may result in depression of the hypoxic ventilatory response. Since there are no receptor-specific antagonists for most anesthetics, there is the need for agnostic respiratory stimulants, that increase respiratory drive irrespective of its cause. We tested whether ENA-001, an agnostic respiratory stimulant that blocks carotid body BK-channels, could restore the hypoxic ventilatory response during propofol infusion. We hypothesize that ENA-001 is able to fully restore the hypoxic ventilatory response.

**Methods:** In this randomized double-blind cross-over trial, 14 male and female healthy volunteers were randomized to receive placebo, low and high dose ENA-001 on three separate occasions. On each occasion, isohypercapnic hypoxic ventilatory responses were measured during a fixed sequence of placebo, followed by low- and high-dose propofol infusion. We conducted a population pharmacokinetic/pharmacodynamic analysis that included oxygen and carbon dioxide kinetics.

**Results:** Twelve subjects completed the three sessions; no serious adverse events occurred. The propofol concentrations were 0.6 and 2.0  $\mu\text{g/mL}$  at low- and high-dose, respectively. The ENA-001 concentrations were 0.6 and 1.0  $\mu\text{g/mL}$  at low- and high-dose, respectively. The propofol concentration that reduced the hypoxic ventilatory response by 50% was  $1.47 \pm 0.20 \mu\text{g/mL}$ . The steady-state ENA-001 concentration to increase the depressed ventilatory response by 50% was  $0.51 \pm 0.04 \mu\text{g/mL}$ . A concentration of 1  $\mu\text{g/mL}$  ENA-001 was required for full reversal of the propofol effect at its  $C_{50}$ .

**Discussion:** In this pilot study, we demonstrated that ENA-001 restored the hypoxic ventilatory response impaired by propofol. This finding is not only of clinical importance, but also provides mechanistic insights into the peripheral stimulation of breathing with ENA-001 overcoming central depression by propofol.

## Introduction

Respiratory depression is a common side effect of anesthetics and analgesics that can lead to serious complications in perioperative patients.<sup>1</sup> Since receptor-specific antagonists are not available for most of the non-opioid anesthetics, agnostic respiratory stimulants that increase breathing activity regardless of the underlying cause of respiratory depression are needed. ENA-001 (formerly known as GAL021) is an agnostic respiratory stimulant that increases breathing activity by blocking calcium-activated potassium channels (BK-channels) at the carotid bodies.<sup>2-</sup>

<sup>6</sup> In previous studies, it was demonstrated that ENA-001 can reverse respiratory depression induced by opioids in healthy volunteers and monkeys.<sup>4-6</sup> Glomus type-1 carotid body cells express BK-channels and release neurotransmitters upon blockade of these channels. The excitatory neurotransmitters activate afferent nerves to the brainstem and subsequently increase breathing.<sup>7,8</sup> The carotid body is the main oxygen sensor in the mammalian body and hypoxia triggers the hypoxic ventilatory response (HVR), a life-saving chemoreflex, that restores pulmonary oxygen uptake. Although the exact mechanism of hypoxic sensing at the carotid bodies is not fully understood, potassium channels are believed to play a role in this process.<sup>9</sup> Hypoxia is a common occurrence in postoperative patients and those undergoing sedation for minor procedures.<sup>10</sup> The causes of hypoxia vary, but impairment of ventilatory control by anesthetic agents, such as inhalational and intravenous anesthetics, can be a significant contributing factor.<sup>11</sup> There is ample evidence that inhalational anesthetics, at already sub-anesthetic concentrations, blunt the HVR at the carotid bodies. Intravenous agents such, as propofol, blunt the response within brainstem respiratory networks.<sup>12-14</sup> Still there is some evidence from small animal studies that at high dose propofol ( $6 \text{ mg.kg}^{-1}.\text{min}^{-1}$ ) may have a direct depressant effect at the carotid bodies.<sup>15</sup> To prevent or treat hypoxic events, agnostic respiratory stimulators may be utilized.<sup>16</sup> This study aimed to assess the effect of ENA-001 on

propofol-induced depression of the HVR in human volunteers. The results of this study will provide valuable information on ENA-001's ability to overcome depression of the HVR induced within brainstem respiratory networks. We hypothesize that ENA-001 can restore the HVR during propofol infusion.

## **Methods**

### **Ethics**

The protocol was approved by the ethics committee BEBO (Stichting Beoordeling Ethiek Biomedisch Onderzoek; Assen, the Netherlands; date of approval August 2, 2021) and the national competent authority, the Central Committee on Research Involving Human Subjects (CCMO, the Hague, the Netherlands). All study procedures were conducted according to good clinical practice guidelines and adhered to the tenets of the Declaration of Helsinki. Prior to enrolment, all subjects gave written informed consent after which their medical history was taken and a physical examination was performed. The study was performed from October 2021 until April 2022 at Leiden University Medical Center and Centre for Human Drug Research (Leiden, the Netherlands) and registered in the trial register of the Dutch Cochrane Center under identifier NL9692 (currently available at [clinicaltrialsregister.nl](https://clinicaltrialsregister.nl); registration date August 22, 2021) with Dr. G.J. Groeneveld as principle investigator. No changes were made to the protocol or trial outcomes after trial commencement.

### **Subjects**

Healthy male and female volunteers, aged 18-55 with weight 55-100 kg, body mass index 18-39 kg/m<sup>2</sup> and with normal vital signs observed during screening (body temperature between 35.5 and 37.5 °C, systolic blood pressure between 90 and 150 mmHg, diastolic blood pressure between 40 and 95 mmHg and pulse rate between 40 and 100 min<sup>-1</sup>) were eligible for participation in the study. Both male and female participants had to use contraception during the

trial and for 3 months thereafter, in case they were sexually active or not surgically sterile. Exclusion criteria included a current diagnosis or history of a psychiatric disease, a history of substance abuse (including alcohol), smoking more than 5 cigarettes per week in the last year, positive urine drug screen at screening or on any of the test days, present or history of a medical (including allergies, malignancies) or surgical condition, motion sickness, participation in any other drug study in the last three months, a family history of malignant hyperthermia, high daily caffeine intake (*e.g.* more than 6 coffee or tea beverages per day), and subjects with an anticipated difficult airway. All subjects were subjected to a urine drug screen and alcohol breath test upon screening and on the day prior to treatment on visits 1-3. In case of a positive tests the subjects were excluded from further participation in the study. The subjects were admitted to the clinical research unit (Centre for Human Drug Research) from 1 day preceding to 1 day following the visit to the Anesthesia & Pain Research Unit at Leiden University Medical Center for the experimental tests.

### **Study design**

The study had a double-blind, placebo-controlled, crossover design. A schematic diagram of the protocol is given in Figure 1. Each study subject underwent three study sessions on separate days. Each session was randomly assigned to placebo, low-dose ENA-001, or high-dose ENA-001. Each session started with the study drug alone, followed by low-dose propofol infusion, and finally high-dose propofol infusion. At each of the study steps or conditions (no propofol, low-dose propofol, high-dose propofol), we tested the ventilatory response to hypoxia (reduced inspired oxygen fraction such that the arterial oxygen saturation is about 80%) at both low and high end-tidal PCO<sub>2</sub>. We report on the pharmacokinetic-pharmacodynamic modeling of the effect of ENA-001 on the depression of the HVR (primary endpoint) and give a short statistical analysis of the raw data (secondary endpoint).

**Randomization, allocation, blinding.** Subjects that successfully completed the screening and had given written informed consent were given a subject number. All subject numbers were randomized for ENA-001 treatment using a computer-generated randomization list (with 6 possible sequences for placebo, low- and high-dose ENA-001). The randomization code was made available to the pharmacy and an unblinded physician of the department of anesthesiology to set the ENA-001 infusion pump but otherwise kept confidential until the study was completed and the data were locked.

**Treatment.** Intravenous propofol and ENA-001 were prepared in syringes by the LUMC pharmacy with the ENA-001 dispensed in unmarked sterile infusion bags (except for study name, subject number and study visit). The drugs were infused using Infusomat® Space infusion pumps (Ref. 87133050, Braun). The ENA-001 infusion scheme was based on the subject's weight and mirrored the dosing scheme of a previous study:<sup>4,5</sup> low-dose  $33.3 \mu\text{g} \cdot \text{kg}^{-1} \cdot \text{min}^{-1}$  for 10 min followed by a continuous infusion of  $6.7 \mu\text{g} \cdot \text{kg}^{-1} \cdot \text{min}^{-1}$  until the end of the study session; high-dose  $33.3 \mu\text{g} \cdot \text{kg}^{-1} \cdot \text{min}^{-1}$  for 20 min followed by a continuous infusion of  $18.3 \mu\text{g} \cdot \text{kg}^{-1} \cdot \text{min}^{-1}$ . An unblinded physician, not involved in the study, set the infusion pump to the correct infusion rate, and the infusion rate was not visible to the research team. Propofol infusion was not blinded and was set for at  $239 \mu\text{g} \cdot \text{kg}^{-1} \cdot \text{min}^{-1}$  for 3 min, followed by  $0 \mu\text{g} \cdot \text{kg}^{-1} \cdot \text{min}^{-1}$  for 6 min and  $24 \mu\text{g} \cdot \text{kg}^{-1} \cdot \text{min}^{-1}$  for 61 min (low-dose phase), a subsequent transition dose for 15 min of  $47 \mu\text{g} \cdot \text{kg}^{-1} \cdot \text{min}^{-1}$ , and subsequently  $239 \mu\text{g} \cdot \text{kg}^{-1} \cdot \text{min}^{-1}$  for 3 min, followed by  $0 \mu\text{g} \cdot \text{kg}^{-1} \cdot \text{min}^{-1}$  for 6 min and  $44 \mu\text{g} \cdot \text{kg}^{-1} \cdot \text{min}^{-1}$  for 61 min (high-dose phase).

**Respiratory testing.** We used the dynamic end-tidal forcing technique to induce steps in end-tidal  $\text{PCO}_2$  ( $\text{P}_{\text{ETCO}_2}$ ) and end-tidal  $\text{PO}_2$  ( $\text{P}_{\text{ETO}_2}$ ), so that we could study the ventilatory response to isocapnic hypoxia at two levels of  $\text{P}_{\text{ETCO}_2}$ .<sup>13,14</sup> To that end, the subjects breathed through a mask covering their nose and mouth, that was connected to a pneumotachograph and pressure



transducer system (Hans Rudolph Inc., Shawnee, Kansas, USA) to measure ventilation. Additionally, we measured in- and expired gas concentrations at the mouth using a Masimo Root ISA OR+ capnograph (Masimo, Irvine, California, USA). The subjects inhaled a gas mixture that was delivered by the 2<sup>nd</sup> generation Leiden gas mixer controlled by ACQ/RESREG software. The system (software and hardware) is custom built (Leiden University Medical Center) and allows collection of ventilation and end-tidal gas concentrations on a breath-to-breath basis and enables imposing variations in inspired gas concentrations to achieve the desired  $P_{ET}O_2$  and  $P_{ET}CO_2$ , independent of the ventilatory response. In this study we applied the following end-tidal gas concentration sequence (See Fig. 1):  $P_{ET}O_2$  13.5 kPa (101 mmHg) for 7-10 min, 5.8 kPa (44 mmHg) for 5 min (hypoxia at low  $PCO_2$ ), 50 kPa (375 mmHg) for 5 min, 13.5 kPa (101 mmHg) for 7-10 min, 5.8 kPa (44 mmHg) for 5 min (hypoxia at high  $PCO_2$ ), 50 kPa (375 mmHg) for 5 min, 13.5 kPa (101 mmHg) for 7-10 min, while the  $P_{ET}CO_2$  was kept at 0.3 kPa (2-3 mmHg) above resting values for 18 min and 1.3 kPa (10 mmHg) above resting for the remaining time (sequence duration 46 min); the low end-tidal  $PO_2$  values correspond with oxygen saturation levels of  $80 \pm 2\%$ . This sequence was performed three times on each study day, first during infusion of placebo, next during infusion of low-dose propofol, and finally during infusion of high-dose propofol, and always during the continuous infusion phase of drug administration. ENA-001 or placebo infusion started 30-min prior to respiratory measurements. The hyperoxic episodes are introduced to counteract any residual effects of 5-min hypoxia.<sup>17</sup>

We tested two oxygen levels:  $P_{ET}O_2$  13.5 kPa (101 mmHg) and 5.8 kPa (44 mmHg). It is our ample experience with hypoxic studies that the former corresponds to an oxygen saturation of 97-100%, the latter to a saturation of  $80 \pm 2\%$ .<sup>9,13,17,18</sup> We did so to induce a brisk hyperventilatory response. Because the relationship between arterial oxygen saturation and ventilation is linear,<sup>9,18</sup> additional hypoxic levels are not needed to get a reliable estimate of the

HVR. Most studies on the effect of drug that we performed do apply hypoxia levels with inspired fractions of 0.05 to 0.058 for 5 min as it is considered a safe level of hypoxia in healthy volunteers.<sup>18</sup> We have safety rules in place in our laboratory that mandates the administration of 100% oxygen when saturation levels fall below 74%. In this study, subjects' safety rules were not required in any of the subjects.

**Blood sampling.** Arterial blood samples (2 mL) for ENA-001 measurement were collected at t = 0 (the start of ENA-001 infusion), 5, 10, 15, 20, 25, 30, 60, 90, 115, 145, 175, 200, 230, 260, 270, 280 and 300 min. Arterial blood samples (2 mL) for propofol measurements were obtained at t = 0, 145, 175, 200, 230, 260, 270, 280 and 300 min. Both drugs were measured in 50  $\mu$ L K2-EDTA plasma by Ardena Bioanalysis BV (Assen, the Netherlands) using validated LC-MS/MS (liquid chromatography tandem mass spectrometry) assays. For ENA-001 the assay was validated over the concentration range of 0.25 to 4,000 ng/mL with a maximum bias of 15% and coefficient of variation of 15%; for propofol the assay was validated for the concentration range 10 to 40,000 ng/mL with a maximum bias of 15% and coefficient of variation of 15%.

**Safety.** Throughout the visit to the research unit blood pressure, heart rate and oxygen saturation were measured continuously. In case of respiratory adverse events beyond the scope of the study, dosing could be reduced, supplemental oxygen could be given and the subjects could be ventilated by mask. Such events included: end-tidal PCO<sub>2</sub> > 9 kPa (60 mmHg) for at least 3-min or < 3.3 kPa (25 mmHg) for at least 2 min, SpO<sub>2</sub> < 90% for at least 1 min during breathing of a normoxic gas mixture, or a respiratory rate < 4 min<sup>-1</sup> for at least 1 min.

### **Data analysis**

The pharmacokinetics and pharmacodynamics of ENA-001 and propofol were analyzed with NONMEM 7.5.1 (Icon Plc., Dublin, Ireland), using a population approach.

**ENA-001 and propofol pharmacokinetics.** The pharmacokinetic data were analyzed using a two-compartmental model. The models were fitted to the data assuming linear scaling with weight using the conditional estimation with interaction method. Diagnostic plots were inspected for outliers.

**Oxygen and carbon dioxide pharmacokinetics (Fig. 2).** Carbon dioxide and oxygen kinetics were modeled via the following differential equations:<sup>19,20</sup>

$$\text{alveolar } V \cdot \frac{d(\text{alveolar } Px)}{dt} = \text{alveolar } V \cdot (\text{inspired } Px - \text{alveolar } Px) + \lambda_0 \cdot \dot{Q} \cdot (\text{mixed venous } Cx - \text{alveolar } Cx), \quad (1)$$

and

$$VTS \cdot \frac{d(\text{mixed venous } Cx)}{dt} = \dot{Q} \cdot (\text{alveolar } Cx - \text{mixed venous } Cx) \pm \lambda_2 \cdot \dot{M}, \quad (2)$$

Where  $V$  is volume,  $x$  either  $O_2$  or  $CO_2$ , and alveolar gas partial pressure (alveolar  $P$ ) is assumed to be equal to arterial pressure and alveolar gas content (alveolar  $C$ ) is assumed to be equal to arterial content,  $VTS$  the apparent tissue volume (*i.e.* the whole body),  $\dot{Q}$  cardiac output,  $\lambda_0 \approx 1.2$  is a constant describing the conversion of STPD (Standard Temperature, Pressure, Dry) to BTPS (Body Temperature and Pressure Saturated), and  $\lambda_2 = 100$  is a unit conversion between volume of gas in air and in blood. The dependencies of the pressure and blood content variables on time have been excluded for the sake of legibility. As the equations are similar for  $CO_2$  and  $O_2$ ,  $\dot{M}$  denotes either carbon dioxide production or oxygen consumption, respectively. Parameters were fixed to literature values, except  $V_{TS}$  to allow for a variable delay between a change in inspired and alveolar partial pressures. The initial change in the alveoli is very fast (within one minute), but incorporating the first differential equation avoids solving the steady-state equation which is

not easily implemented because of the nonlinear relationship between oxygen pressure and blood content. Note that the unit for content is mL of gas per 100 mL of blood.

Blood chemistry was simplified as much as possible by assuming the following relationships between pressure and blood content:

$$alveolar CO_2 = \frac{alveolar PCO_2}{\lambda_1} \quad (3)$$

$$P = alveolar PO_2 \quad (4)$$

$$SO_2 = 1 / (1 + \frac{23400}{P \cdot (P + 150)}) \quad (5)$$

$$alveolar CO_2 = 20.85 \cdot SO_2 + 0.003 \cdot P \quad (6)$$

where  $\lambda_1 = 0.115$  is a linear approximation of the solubility of carbon dioxide in blood, and the equation for blood saturation,  $SO_2$ , is an approximated oxygen saturation in arterial blood.<sup>21</sup>

**The ventilatory controller (Fig. 2).** Minute ventilation was assumed to be approximately linearly related to alveolar  $PCO_2$  and  $SO_2$ :

$$\dot{V}_E = baseline \dot{V}_E - G \cdot H(0) + [S \cdot (baseline SO_2 - effect\ site\ SO_2) + 1] \cdot G \cdot H(effect\ site\ PCO_2 - alveolar\ PCO_2\ at\ baseline), \quad (7)$$

with

$$H(x) = \delta \cdot \log\left(1 + \exp\left(\frac{x}{\delta}\right)\right), \text{ with } \delta = 0.1, \quad (8)$$

and  $H(x)$  is the “hinge” function,<sup>22</sup> allowing for a nonlinearity around baseline  $PCO_2$  (*i.e.* the Hinge function describes the ventilatory transition from normocapnia to hypercapnia; see also Hellinga et al.<sup>20,23</sup>) with  $x = (effect\text{-}site\ PCO_2 - baseline\ PCO_2)$  and  $H(x) = 0$  when  $x < 0$  and  $H(x) = x$  when  $x > 0$ .  $G \cdot H(0)$  was subtracted from baseline ventilation, because it is not exactly equal to zero at baseline  $PCO_2$  ( $x = 0$ ). Effect site  $SO_2$  and  $PCO_2$  denote the blood oxygen saturation and carbon dioxide pressure at the respiratory controller, where the former was calculated from the effect-site  $PO_2$ . The effect-site gas pressures were assumed to be delayed

with respect to the alveolar/arterial pressures *via* time constant  $\tau$ .  $S$  is oxygen sensitivity and  $G$  carbon dioxide sensitivity.

The multiplication between the carbon dioxide and oxygen dependent terms in eq. (7) (Fig. 2) allows for the interaction of  $\text{CO}_2$  and  $\text{O}_2$  on ventilation (at hypercapnia the hypoxic sensitivity increases), an effect attributed to the carotid bodies.

The solution of the differential equations requires initial conditions for alveolar  $\text{PCO}_2$  and  $\text{PO}_2$ . From these, initial values for alveolar carbon dioxide and oxygen content were calculated from the equations above, and initial conditions for venous carbon dioxide and oxygen content were calculated from the steady-state solutions of the differential equations for the tissues. The difference between minute ventilation and alveolar ventilation, dead space ventilation, was estimated ( $V_D$ ). The three output variables alveolar  $\text{PCO}_2$ , alveolar  $\text{PO}_2$  and minute ventilation were simultaneously fitted. The nine parameters to be estimated were the tissue storage volume for carbon dioxide and oxygen, alveolar  $\text{PCO}_2$  and  $\text{PO}_2$  at baseline,  $\tau$ , dead space ventilation,  $G$  and  $S$ . The following parameters were fixed to their physiological or pharmacological values: cardiac output 5 L/min,  $\text{CO}_2$  production 200 mL/min,  $\text{O}_2$  consumption 250 mL/min, alveolar volume 3 L and hematocrit = 0.4 with  $\text{O}_2$  content at 100% saturation 20.85 mL per 100 mL blood.<sup>24</sup>

**Pharmacodynamics (Fig. 2).** Propofol and ENA-001 were assumed to have a depressant and excitatory effect on hypoxic/hypercapnic ventilation, respectively. Therefore, the multiplicative term in eq. (7) (\* in Fig. 2) was multiplied with the following empiric function of the effect-site propofol and ENA-001 concentrations,  $C_E\text{PROPOFOL}$  ( $C_E P$ ) and  $C_E\text{ENA-001}$  ( $C_E E$ ):

$$F(C_E P, C_E E) = \frac{1 + 0.5 \cdot \left( \frac{C_E E}{C_{E50E}} \right)}{1 + \left( \frac{C_E P}{C_{E50P}} \right)^\gamma} \quad (9)$$

where  $C_{50P}$  and  $C_{50E}$  are the concentrations of propofol and ENA-001 that give 50% depression and 50% reversal, respectively, and  $\gamma$  a shape parameter. Propofol blood-effect-site half-time was assumed to be 2.5 min, and ENA-001 blood-effect-site half-time 0 min.

From eq. (9) it follows that ENA-001 counteracts propofol depression when  $F = 1$ , so when

$$CE = 2 \cdot C_{50E} \cdot \left( \frac{C_{EP}}{C_{E50P}} \right)^\gamma, \quad (10)$$

where CE is the ENA-001 concentration and CP the propofol concentration. The subscript E denotes effect-site concentration. The three parameters to be estimated are  $C_{50P}$ ,  $C_{50E}$  and  $\gamma$ , bringing the total number of parameters to be estimated to 12.

**Statistical analysis.** No formal sample size analysis was performed. We consider the current sample of 12-14 subjects a convenience sample, and mimicked our earlier study on the influence of the same doses of ENA-001 (at that time called GAL021) as used in the current study on alfentanil-induced respiratory depression. In that study,<sup>4,5</sup> 12 subjects were sufficient to detect a significant reversal of respiratory depression (increase in ventilation relative to placebo 6.1 L/min at an alfentanil plasma concentration of 40-50 ng/mL). In the current study, we anticipated a similar stimulatory effect of ENA-001 in 12-14 healthy and young subjects.

The primary endpoint was the PK/PD analysis (*i.e.* the steady-state or effect-site ENA-001 concentration to increase the propofol-depressed ventilatory response by 50%). The PK/PD models were fitted to the data in NONMEM using a sequence of its estimation steps: Iterative Two-stage (ITS) for initial estimates, Stochastic Approximation Expectation Maximization (SAEM) for parameter estimation, Importance Sampling (IMP) for objective function evaluation, and BAYES for assessment of standard errors of the model parameters and derived parameters (for example eq. (10)). With twelve subjects and three visits, the number of interindividual ( $\omega^2$ ) and inter-occasion ( $v^2$ ) variance terms were limited and assigned to the most plausible

parameters;  $\eta$ -shrinkages were inspected to check for validity of this approach. Visual predictive checks (VPCs) were run using Pearl speaks NONMEM (PsN; <https://uupharmacometrics.github.io/PsN/>) with default settings and stratification on dose level for ENA-001 kinetics, and data type: alveolar PCO<sub>2</sub>, alveolar PO<sub>2</sub> and minute ventilation. P-values < 0.01 were considered significant.

Full descriptive analyses are published elsewhere.<sup>25</sup> Here, we present a secondary analysis on the hypoxic ventilatory responses at low- and high-dose ENA-001 *versus* placebo. The data were analyzed with a mixed model with fixed factors treatment (ENA-001), condition (propofol) and treatment  $\times$  condition and random factors subject, subject  $\times$  treatment and subject  $\times$  condition. If a significant treatment effect was detected, the contrasts low-dose ENA-001 *versus* placebo and high-dose ENA-001 *versus* placebo were calculated within the model. If the interaction term treatment  $\times$  condition was not significant, no further comparisons were performed. For the descriptive analyses, p-values < 0.05 were considered significant, without type 1 error control. The analysis was performed in SAS for Windows (SAS Institute Inc., Cary, NC, USA).

## Results

A total of 14 subjects were randomized. Twelve subjects completed all three visits without serious side effects; two subjects withdrew from the study on the first study day because of anxiety in one subject occurring during the first hypoxic test, prior to any drug administration and restlessness, and anxiety during high-dose propofol infusion but prior to hypoxic testing in another subject. Both subjects were exposed to high dose ENA-001. No serious adverse events related to study medication were observed. Predominantly observed among treatment-related adverse events was infusion site pain, lasting approximately 20-min ( $n = 8$  for low-dose ENA-001 and  $n = 12$  for high-dose ENA-001), with no discernable trend among other adverse events.

The characteristics of the 12 subjects are given in Table 1; their data were used in the PK/PD and statistical analyses.

The mean  $\pm$  SD ENA-001 and propofol concentration profiles during respiratory testing are presented in Figure 3. An example of the effect of placebo and high-dose ENA-001 on hypoxic ventilatory responses of a single subject are given in Figure 4. The top 3 panels (A-C) depict the responses at normocapnia and hypercapnia during no drug (control; A), low dose propofol (B) and high dose propofol (C) without any ENA-001 infusion. It shows the depressant effect of propofol on the hypoxic ventilatory response with a control (no drugs given) response at normocapnia and hypercapnia of 0.44 and 0.72 L.min<sup>-1</sup>.%<sup>-1</sup>, respectively (panel A) that is reduced to 0.17 and 0.15 L.min<sup>-1</sup>.%<sup>-1</sup> during high-dose propofol infusion (panel C). During infusion of high-dose ENA-001 the hypoxic ventilatory response increased to 1.12 and 1.28 L.min<sup>-1</sup>.%<sup>-1</sup> at normocapnia and hypercapnia (no propofol given; Panel D), while at during high-dose propofol infusion the response was 0.88 and 1.54 L.min<sup>-1</sup>.%<sup>-1</sup> (panel F) at the low and high CO<sub>2</sub> levels, respectively. The responses at high-dose propofol (panel F), in this particular subject, were greater than those observed without any drug infused (panel A). The mean responses  $\pm$  95% confidence intervals at each treatment level are given in Figure 5. We observed a significant ENA-001 treatment effect ( $p < 0.0001$ ), a significant condition effect ( $p < 0.0001$ ) while the interaction term treatment  $\times$  condition was not significant ( $p = 0.402$ ). Post-hoc analysis revealed a significant effect of high-dose ENA-001 *versus* placebo ( $p < 0.0001$ ) but not low-dose ENA-001 *versus* placebo ( $p = 0.090$ ). Figure 5 further depicts the multiplicative effect of hypercapnia on the hypoxic ventilatory response, particularly during no drug and low-dose propofol.

Pharmacokinetic parameter estimates in Supplemental Table 1

(<https://links.lww.com/ALN/D449>). In Supplemental Figure 1

(<https://links.lww.com/ALN/D449>), the measured ENA-001 data and individual data fits are



presented for low- and high-dose ENA-001 (panels A and B), and goodness of fit plots (panels C-D). These graphs indicate that the PK model adequately described the ENA-001 data. The pharmacodynamic parameter estimates are presented in Table 2 for the 12 estimated parameters and their variability estimates. The steady-state concentration propofol that reduced the HVR by 50% was  $1.47 \pm 0.20$   $\mu\text{g/mL}$ , the steady-state ENA-001 concentration to increase the depressed ventilatory response by 50% was  $0.51 \pm 0.04$   $\mu\text{g/mL}$ . For validation of the standard errors of the estimate, they were compared with those from the Importance Sampling step and were all of the same order of magnitude. For the two important potency parameters the 95% confidence intervals were determined using Pearl speak NONMEM "llp" procedure. These were 1.03-2.00 and 0.41-0.63  $\mu\text{g/mL}$ , for the  $C_{50}$  of propofol and ENA-001, respectively. At their  $C_{50}$ -values, the combined effect of both drugs resulted in an overall 25% reduction of the HVR. A steady-state concentration of 1  $\mu\text{g/mL}$  ENA-001 was needed for full reversal of the propofol effect at its  $C_{50}$  (Fig. 6). Goodness of fit plots are presented in Supplemental Figure 2 (<https://links.lww.com/ALN/D449>) for the three simultaneously fitted parameters: alveolar  $\text{PCO}_2$ , alveolar  $\text{PO}_2$  and minute ventilation. These diagnostic graphs indicate that the data were well described by the physiological pharmacodynamic model depicted in Figure 2. Population predicted ventilatory responses to hypoxia and hypoxia/hypercapnia are given in Supplemental Figure 3 (<https://links.lww.com/ALN/D449>) for all 9 conditions tested. These graphs indicate that at high-dose propofol, the stimulatory effect of high-dose ENA-001 caused the return of the ventilatory response to placebo levels without any drug (compare green line of the high-dose propofol data with the red line of the placebo data).

## Discussion

In the current study, we quantified the effect of the BK-channel blocker ENA-001 on propofol-induced depression of the HVR. Our findings demonstrate that ENA-001 was effective in restoring the propofol-impaired HVR, as shown in Figure 5. Additionally, we determined that to fully reverse the depressant effects of propofol at a steady-state concentration of 2  $\mu\text{g/mL}$ , an ENA-001 concentration of 1.5  $\mu\text{g/mL}$  was required, as illustrated in Figure 6. These results support our hypothesis that ENA-001 can reverse the effect of centrally acting depressants on the HVR during normocapnia and hypercapnia over the propofol concentration range tested (0-2000  $\text{ng/mL}$ ).

### Propofol-induced respiratory depression

We and others showed that propofol has a negative impact on metabolic ventilatory control.<sup>13,14,26</sup> Particularly, it reduces the ventilatory response to hypoxia, and can lead to hypercapnia, bradypnea and apnea at high dose.<sup>13,14,26</sup> Given its widespread use in anesthesia, procedural sedation and during surgery under regional anesthesia, it is important to understand its effects on ventilatory control and examine the ability to reverse or prevent such adverse effects.

In a previous study in healthy volunteers, we demonstrated that propofol, at measured plasma concentrations of 0.5-1.3  $\mu\text{g/mL}$  and bispectral index values around 70, primarily affects ventilatory control within the central chemoreflex loop at the central chemoreceptors.<sup>14</sup> We observed that propofol reduced the gain of the slow (central chemoreflex) component of the ventilatory response to a multifrequency binary carbon dioxide sequence, without affecting the gain of the fast (peripheral chemoreflex) component or the response dynamics. This suggests that propofol does not affect the peripheral chemoreceptors at the carotid bodies, as supported by a study that showed that sudden inhalation of 100% oxygen rapidly reduced ventilation in propofol anesthetized patients.<sup>27</sup> Still, there are both animal and human data that shows that propofol

blunts the hypoxic ventilatory response.<sup>13,15,28</sup> While humans studies were not able to detect the site of action of propofol, Ponte and Sadler showed that high rates of propofol infusion (6 mg/min) the response to hypoxia but not to potassium was abolished in rats and rabbits as measured from single chemoreceptor fiber afferent output measured in the sinus nerve just proximal from its junction with the glossopharyngeal nerve.<sup>15</sup> At lower doses (2 mg/min) depression of chemosensitivity was still observed but less marked. These data indicate that a direct effect of propofol on the carotid body may arise at high doses of propofol, higher than used in the current study. Given the above, at the propofol concentrations measured in our study (up to 2.2 µg/mL and bispectral index values 50 to 60), a dominant effect at the carotid bodies seems unlikely, while we cannot rule out an effect at pathways common to the peripheral and central chemoreflex loops, such as brainstem respiratory centers, phrenic nerve motor pool, lung or diaphragm. We therefore attribute the reduced HVR observed in our current study to an effect at the central chemoreceptors, the brainstem respiratory centers and efferent ventilatory motor pathways, which collectively depress the HVR.

In this context, it is important to note that the stimulatory effect of ENA-001 in our study is thus thought to originate at the intact carotid bodies. Additional research is needed to ascertain the ENA-001 effect when ENA-001 is administered in conjunction with drugs used in anesthesia that target the carotid bodies (see below).

#### **ENA-001 effect on ventilatory control**

In rats, ENA-001 increases sinus nerve output in a dose-dependent manner, but this effect disappears upon carotid body denervation.<sup>6</sup> In mice that lack crucial subunits of the BK-channel (*Slo*<sup>-/-</sup> mice), the effect of ENA-001 was significantly reduced, indicating that the molecular target for ENA-001 is the BK-channel expressed on type 1 cells of the carotid bodies, which are the peripheral chemoreceptors.<sup>6</sup> Our current study confirms these findings by showing that ENA-

001 enhances the HVR during placebo and propofol infusions, which we relate to its effect at the carotid body BK-channels.

While it was previously believed that peripheral stimulation may not be sufficient to overcome respiratory depression arising at central sites,<sup>5,29</sup> our current study challenges this idea by demonstrating the efficacy of ENA-001 in overcoming central respiratory depression without any signs of ceiling over the measured propofol concentration range (0-2000 ng/mL). However, as mentioned above, it should be noted that ENA-001 has only been studied under the condition of an intact carotid body function. Various drugs used in anesthesia and in the intensive care unit impair the carotid body response to hypoxia and hypercapnia. For instance, low-dose (< 0.1-0.2%) halothane, isoflurane, and sevoflurane have been shown to severely blunt the HVR by an effect exclusively at the carotid bodies, and low-dose dopamine infusion behaves similarly.<sup>11,12,30,31</sup> Additionally, carotid body function may be affected by various illnesses such as atherosclerosis or diabetes mellitus. Thus, further research is needed to determine whether ENA-001 can restore carotid body response to hypoxia under these conditions.

### **The population pharmacokinetic-pharmacodynamic model**

In this study, we investigated the effects of propofol and ENA-001 on the ventilatory response to hypoxia at the background of low and high levels of hypercapnia. To describe the effect of ENA-001 on carotid body activity, we developed a pharmacodynamic model based on the interaction between oxygen sensitivity (S) and carbon dioxide sensitivity (G), represented by the term  $S \times G$  in equation 7, which we termed the HVR for practical purposes. The model adequately described the data and our model parameter estimates (Table 2) were consistent with previous studies.<sup>14,19,20,32</sup> In concert, this supports our assumption that modelling ENA-001 effect at the oxygen-carbon dioxide multiplicative site within the carotid bodies was physiologically relevant.

The term  $S \times G$  equals approximately 1.0 at baseline; propofol reduced this term by 50% at a steady-state concentration of 1.5  $\mu\text{g/mL}$ , which was restored by ENA-001 at a steady-state concentration of 0.5  $\mu\text{g/mL}$  by 50% ( $S \times G = 0.75$ ). The concentration ENA-001 required to fully reverse the blunted HVR caused by propofol at a steady-state propofol concentration of 2  $\mu\text{g/mL}$  was 1.6  $\mu\text{g/mL}$  ( $S \times G = 1.0$ ). Our results indicate that ENA-001 can reverse the effect of a centrally acting respiratory depressant on the HVR within the tested range of propofol concentrations (0-2  $\mu\text{g/mL}$ ).

### Study limitations

We acknowledge some limitations in our study. This study was performed in a small data set and no formal power analysis was conducted for the pharmacokinetic/pharmacodynamic analysis, which was a secondary analysis of the data. The pharmacodynamic model we used to assess the effect of ENA-001 on the interaction between oxygen and carbon dioxide may not have fully captured the multiplicative process physiologically, and is best considered a fair approximation. Additionally, our study was conducted in a highly controlled experimental setting with a small sample size of healthy young adults and with fixed levels of hypoxia and hypercapnia, which may not reflect the variability of patients who receive multiple drugs and may have complex comorbidities. Furthermore, our study only examined the effect of ENA-001 on one anesthetic agent, propofol, while multiple drugs are retained in the body following general anesthesia or during procedural sedation. However, our study has certainly some clinical relevance as it tested a common clinical observation in postoperative and procedural patients, *i.e.*, hypoxia combined with hypercapnia. Additionally, our study serves as a mechanistic proof of concept and provides a model for future studies examining the effect of other stimulants, such as doxapram, another potassium channel blocker that stimulates breathing via an effect at the carotid bodies.<sup>33</sup> It is important to note that our findings should be confirmed in additional studies, including those in

postoperative patients or patients that undergo a minor procedure under sedation, and those examining the effect of ENA-001 in the presence of drugs that impair carotid body function. Moreover, the current results related to the measured plasma concentrations of ENA-001 and propofol, and extrapolations beyond the measured data should be performed with caution.<sup>5</sup> Further studies are needed to address the effect of higher doses of ENA-001 than studied here on higher concentrations of propofol than applied here. Finally, in this crossover study, we cannot exclude some carry-over effects. The time between study days, however, was ample, and within day effects of the previous propofol dose, were considered in the PK/PD analyses. Overall, we argue that carry-over effects were of limited importance in the outcome of our study.

## Conclusions

Our study demonstrates that ENA-001 can effectively restore the hypoxic ventilatory response under conditions of central respiratory depression due to propofol administration. Our mechanistic model suggests that ENA-001 acts on the BK-channels in the carotid body, specifically via the oxygen-carbon dioxide multiplicative component of the HVR. Our findings, supported by previous studies, indicate that ENA-001 has potential as an agnostic respiratory stimulator for preventing or treating respiratory depression from drugs that depress ventilation at central sites, *i.e.* within the brainstem respiratory networks.

## Supplemental Digital Content

Supplemental document: Supplemental Table 1 (Pharmacokinetic Parameter Estimates) and Supplemental Figures 1-3, <https://links.lww.com/ALN/D449>

## References

1. Dahan A, Niesters M, Smith T, Overdyk F: Opioids, Clinical Anesthesia, 8<sup>th</sup> edition, Edited by Barash PG, Cullen BF, Stoelting RK, Cahalan MK, Stock MC, Ortega R, Sharar SR, Holt NF. New York, Wolters Kluwer, 2000, pp. 505-26
2. McCartney CE, McClafferty H, Huibant JM, Rowan EG, Shipston MJ, Rowe IC: A cysteine-rich motif confers hypoxia sensitivity to mammalian large conductance voltage- and Ca-activated K (BK) channel alpha-subunits. *Proc Natl Acad Sci USA* 2005; 102: 17870-6
3. McLeod JF, Leempoels JM, Peng SX, Dax SL, Myers LJ, Golder FJ: GAL-021, a new intravenous BK<sub>Ca</sub>-channel blocker, is well tolerated and stimulates ventilation in healthy volunteers. *Br J Anaesth* 2014; 113: 875-83
4. Roozkrans M, van der Schrier R, Okkerse P, Hay J, McLeod JF, Dahan A. Two studies on reversal of opioid-induced respiratory depression by BK-channel blocker GAL021 in human volunteers. *Anesthesiology* 2014; 121: 459-68
5. Roozkrans M, Olofsen E, van der Schrier R, van Gerven J, Peng S, McLeod J, Dahan A. Reversal of opioid-induced respiratory depression by BK-channel blocker GAL021: A pharmacokinetic-pharmacodynamic modelling study in healthy volunteers. *Clin Pharmacol Ther* 2015; 97: 641-9
6. Golder FJ, Dax S, Baby SM, Gruber R, Hoshi T, Ideo C, Kennedy A, Peng S, Puskovic V, Ritchie D, Woodward R, Wardle RL, Van Scott MR, Mannion JC, MacIntyre DE: Identification and characterization of GAL-021 as a novel breathing modulator. *Anesthesiology* 2015; 123: 1093-104
7. Peers C, Wyatt CN, Evans AM: Mechanisms for acute oxygen sensing in the carotid body. *Respir Physiol Neurobiol* 2010; 174: 292-8

8. Lahiri S, Roy A, Baby SM, Hoshi T, Semenza GL, Prabhakar NR: Oxygen sensing in the body. *Prog Biophys Mol Biol* 2006; 91: 249-86
9. Teppema L, Dahan A: The Ventilatory response to hypoxia in mammals: Mechanisms, measurement, and analysis. *Physiol Reviews* 2010; 90: 675-754
10. Sun Z, Sessler DI, Dalton JE, Devereaux PJ, Shahinyan A, Naylor AJ, Hutcherson MT, Finnegan PS, Tandon V, Darvish-Kazem S, Chugh S, Alzayer H, Kurz A: Postoperative hypoxemia is common and persistent: a prospective blinded observational study. *Anesth Analg* 2015; 121: 709-15
11. Dahan A, Teppema LJ: Influence of anaesthesia and analgesia on the control of breathing. *Br J Anaesth* 2003; 91: 40-9
12. Knill RL, Clement JL: Site of selective action of halothane on the peripheral chemoreflex pathway in humans. *Anesthesiology* 1984; 61: 121-6
13. Nieuwenhuijs D, Sarton E, Teppema L, Dahan A: Propofol for monitored anesthesia care: Implications on hypoxic control of cardiorespiratory responses. *Anesthesiology*, 2000; 92: 46-54
14. Nieuwenhuijs D, Sarton E, Teppema L, Olievier I, Kruyt E, Dahan A: Respiratory sites of action of propofol: Absence of depression of peripheral chemoreflex loop by low dose propofol. *Anesthesiology*, 2001, 95: 889-95
15. Ponte J, Sadler CL: Effect of thiopentone, etomidate and propofol on carotid body chemoreceptor activity in the rabbit and the cat. *Br J Anaesth* 1989; 62:41-5
16. Peppin JF, Pergolizzi JV, Dahan A, Raffa RB: Commentary: complications make treatment of “opioid” overdose challenging. *Pharmacol Pharm* 2020; 11: 362-72
17. Easton PA, Slykerman LJ, Anthonisen NR: Recovery of the ventilatory response to hypoxia in normal adults. *J Appl Physiol* 1988; 64: 521-8



18. Dahan A, Sarton E, van den Elsen M, van Kleef J, Teppema L, Berkenbosch A: Ventilatory response to hypoxia: influences of subanesthetic desflurane. *Anesthesiology* 1996; 85: 60-8
19. Olofsen E, Boom M, Nieuwenhuijs D, Sarton E, Teppema L, Aarts L, Dahan A: Modeling the non-steady-state respiratory effects of remifentanyl in awake and propofol sedated healthy volunteers. *Anesthesiology* 2010; 212: 1382-95
20. Hellinga M, Algera MH, Olofsen E, van der Schrier R, Sarton E, van Velzen M, Dahan A, Niesters M: Oral oxycodone-induced respiratory depression during normocapnia and hypercapnia: a pharmacokinetic-pharmacodynamic modelling study. *Clin Pharmacol Ther* 2023; 113: 1080-8
21. Severinghaus J: Simple, accurate equations for human blood O<sub>2</sub> dissociation computations. *J Appl Physiol* 1979; 46: 599-602
22. Columbia University: A continuous hinge function for statistical modeling. <https://statmodeling.stat.columbia.edu/2017/05/19/continuous-hinge-function-bayesian-modeling/> (last accessed on March 17, 2023)
23. Hellinga M, Algera MH, van der Schrier R, Sarton E, van Velzen M, Dahan A, Olofsen E, Niesters M: A biomarker of opioid-induced respiratory toxicity. *iScience* 2023; 26: 106520
24. Lumb AB, Thomas CR: Nunn and Lumb's Applied Respiratory Physiology, 9thn edition. Amsterdam, Elsevier Ltd. 2021
25. Moss L, Jansen S, van der Schrier R, Miller T, Colucci R, Pergolizzi J, de Kam M, Dahan A, Groeneveld GJ, Kremer P: ENA-001, a novel BK-channel blocker, increases sensitivity to hypoxia and mitigates propofol-induced respiratory effects in healthy volunteers. 2023, submitted
26. Goodman NW, Black AMS, Carter JA: Some ventilatory effects of propofol as a sole anaesthetic agent. *Br J Anaesth* 1987; 59: 1497-503

27. Goodman NW, Black AMS, Carter JA: Some ventilatory effects of propofol as a sole anaesthetic agent. *Br J Anaesth* 1987; 59: 1497-503
28. Nagyova B, Dorrington KL, Gill EW, Robbins PA. Comparison of the effects of sub-hypnotic concentrations of propofol and halothane on the acute ventilatory response to hypoxia. *Br J Anaesth* 1995; 75: 713-8
29. Cotten JF: The latest pharmacologic ventilator. *Anesthesiology* 2014; 121: 442-4
30. Welsh MJ, Heistad DD, Abboud FM: Depression of ventilation by dopamine in man: evidence for an effect on the chemoreceptor reflex. *J Clin Invest* 1978; 61: 708-13
31. Dahan A, Ward, D, van den Elsen M, Temp J, Berkenbosch A: Influence of reduced carotid body drive during sustained hypoxia on hypoxic depression of ventilation in humans. *Journal of Applied Physiology* 1996; 81: 565-72
32. Robbins PA: The ventilatory response of the human respiratory system to sine waves of alveolar carbon dioxide and hypoxia. *J Physiol (Lond)* 1984; 350: 461-74
33. Roozkrans M, Olofsen E, van der Schrier R, Boom M, Mooren R, Dahan .: Doxapram-mediated increase in cardiac output reduces opioid plasma concentrations: a PK-PD/PK-PD modeling study in healthy volunteers. *Clin Pharmacol Ther* 2017; 102: 115-22

## Legends to the figures

**Figure 1.** Schematic diagram of the hypoxic (red lines) and hypercapnic (blue lines) stimuli given on a single visit. The first set of stimuli is given during placebo infusion, the next during low-dose propofol infusion, and the last during high-dose propofol infusion. Each subject visited the research unit on three occasions. On one occasion placebo was infused from  $t = 0$  to  $t = 270$  min, on another low-dose ENA-001 and on another high-dose ENA-001; these administrations were randomized.

**Figure 2.** Schematic diagram of the pharmacokinetic and pharmacodynamic model. The model has 4 distinct parts. Part 1 (bottom panel) is the part that describes the pharmacokinetics of propofol and ENA-001. Part 2 described the pharmacodynamics of propofol with an inhibitory sigmoid EMAX model and ENA-001 with a power model (approximated by a linear function). Propofol reduces hypoxic/hypercapnic ventilation, while ENA-001 stimulates the propofol-induced depression of hypoxic/hypercapnic ventilation. Part 3 is the respiratory controller where oxygen and carbon dioxide sensitivity interact in a multiplicative fashion at \*. Part 4 (top panel) describes oxygen and carbon dioxide kinetics. VTS is tissue volume,  $alvV$  is alveolar ventilation,  $VCO_2$  is carbon dioxide production,  $\tau$  is a time constant,  $VO_2$  is oxygen consumption,  $\Delta SAT$  is the difference between baseline and effect-site oxygen saturation,  $S$  is the hypoxic ventilatory sensitivity,  $\Delta PCO_2$  is the difference between alveolar and baseline  $PCO_2$ ,  $G$  is the hypercapnic ventilatory sensitivity,  $H$  is the hinge function,  $V_1P$  and  $V_2P$  are the volumes of the first and second propofol pharmacokinetic compartments,  $V_1E$  and  $V_2E$  are the volumes of the first and second ENA-001 pharmacokinetic compartments.

**Figure 3.** Plasma concentrations of propofol (A) and ENA-001 (B) during each study visit. The grey areas depict the time of the hypoxic and hypercapnic stimuli. Data are mean  $\pm$  SD.

**Figure 4.** Effect of placebo (panels A-C) and high-dose ENA-001 (panels D-F) on hypoxic ventilatory responses of subject 006. In each panel the response to hypoxia at normocapnia (N) and hypercapnia (H) are given (from left to right). A and D: control response (no propofol) with in panel D the ENA-001 effect; B and E: low-dose propofol with in panel E the ENA-001 effect; C and F: high-dose propofol with in panel F the ENA-001 effect. The orange lines depict oxygen saturation, each blue circle depicts a 1-min ventilation average.

**Figure 5.** Average hypoxic ventilatory responses at normocapnia and hypercapnia during no drug infusion, low- and high-dose propofol infusion with treatments placebo (green), low-dose ENA-001 (blue) and high-dose ENA-001 (red). Treatment effect was significant for high-dose ENA-001 *versus* placebo (\*:  $p < 0.0001$ ) but not for low-dose ENA-001 *versus* placebo (NS:  $p = 0.090$ ). Data are mean  $\pm$  95% confidence interval.

**Figure 6.** ENA-001 concentration (y-axis) that fully reverses the depression of the hypoxic/hypercapnic ventilatory response induced by a specific propofol concentration (x-axis). The data are  $\pm$  95% confidence interval.

**Table 1. Demographic data of participants**

|                            |            |
|----------------------------|------------|
| Total enrolled subjects    | 12         |
| Sex (M/F)                  | 7/5        |
| Caucasian (n)              | 10         |
| Black (n)                  | 1          |
| Asian (n)                  | 1          |
| Age (years, mean [range])  | 28 [19-41] |
| Height (cm) *              | 178 ± 10   |
| Weight (kg) *              | 70 ± 12    |
| BMI (kg/m <sup>2</sup> ) * | 22 ± 2     |
| MAP (mmHg) 8               | 81 ± 25    |
| HR (min <sup>-1</sup> ) *  | 58 ± 6     |

\* Mean ± SD

**Table 2.** Pharmacodynamic model estimates

| Parameter                                   | Estimate $\pm$ SEE | Between-subject variability ( $\omega^2$ ) $\pm$ SEE | Inter-occasion variability ( $v^2$ ) $\pm$ SEE |
|---------------------------------------------|--------------------|------------------------------------------------------|------------------------------------------------|
| VTSCO <sub>2</sub> (L)                      | 14.3 $\pm$ 0.6     |                                                      |                                                |
| VTSO <sub>2</sub> (L)                       | 9.7 $\pm$ 0.5      |                                                      |                                                |
| PCO <sub>2</sub> at baseline (kPa)          | 5.2 $\pm$ 0.2      |                                                      | 0.003 $\pm$ 0.001                              |
| PO <sub>2</sub> at baseline (kPa)           | 14.7 $\pm$ 0.7     |                                                      | 0.038 $\pm$ 0.012                              |
| V <sub>D</sub> (L/min)                      | 2.6 $\pm$ 0.1      |                                                      |                                                |
| $\tau$ (min)                                | 0.78 $\pm$ 0.03    |                                                      |                                                |
| Ventilation at baseline (L/min)             | 5.0 $\pm$ 0.4      |                                                      | 0.193 $\pm$ 0.065                              |
| G (L.min <sup>-1</sup> .kPa <sup>-1</sup> ) | 10.7 $\pm$ 2.2     | 0.47 $\pm$ 0.22                                      |                                                |
| S (L.min <sup>-1</sup> .% <sup>-1</sup> )   | 0.13 $\pm$ 0.01    | 0.12 $\pm$ 0.06                                      |                                                |
| C <sub>50</sub> Propofol ( $\mu$ g/mL)      | 1.47 $\pm$ 0.20    | 0.20 $\pm$ 0.10                                      |                                                |
| $\gamma$ propofol                           | 1.6 $\pm$ 0.1      |                                                      |                                                |
| C <sub>50</sub> ENA-001 ( $\mu$ g/mL)       | 0.51 $\pm$ 0.04    |                                                      |                                                |
| $\sigma^2$ PCO <sub>2</sub>                 | 0.058 $\pm$ 0.001  |                                                      |                                                |
| $\sigma^2$ PO <sub>2</sub>                  | 2.62 $\pm$ 0.049   |                                                      |                                                |
| $\sigma^2$ Ventilation                      | 7.0 $\pm$ 0.14     |                                                      |                                                |

VTS is body stores, V<sub>D</sub> dead space ventilation,  $\tau$  time constant,  $\gamma$  a shape parameter,  $\sigma^2$  residual noise or within-subject variability, G the sensitivity of the ventilatory controller to a change in PCO<sub>2</sub> (gain), S the sensitivity of the ventilatory controller to a change in oxygen saturation (oxygen sensitivity), C<sub>50</sub>Propofol is potency of propofol as determined from the sigmoid E<sub>MAX</sub> model with shape parameter GAMMA, C<sub>50</sub>ENA-001 potency of EN-001 as determined by a power model (approximated by a linear function).

Figure 1

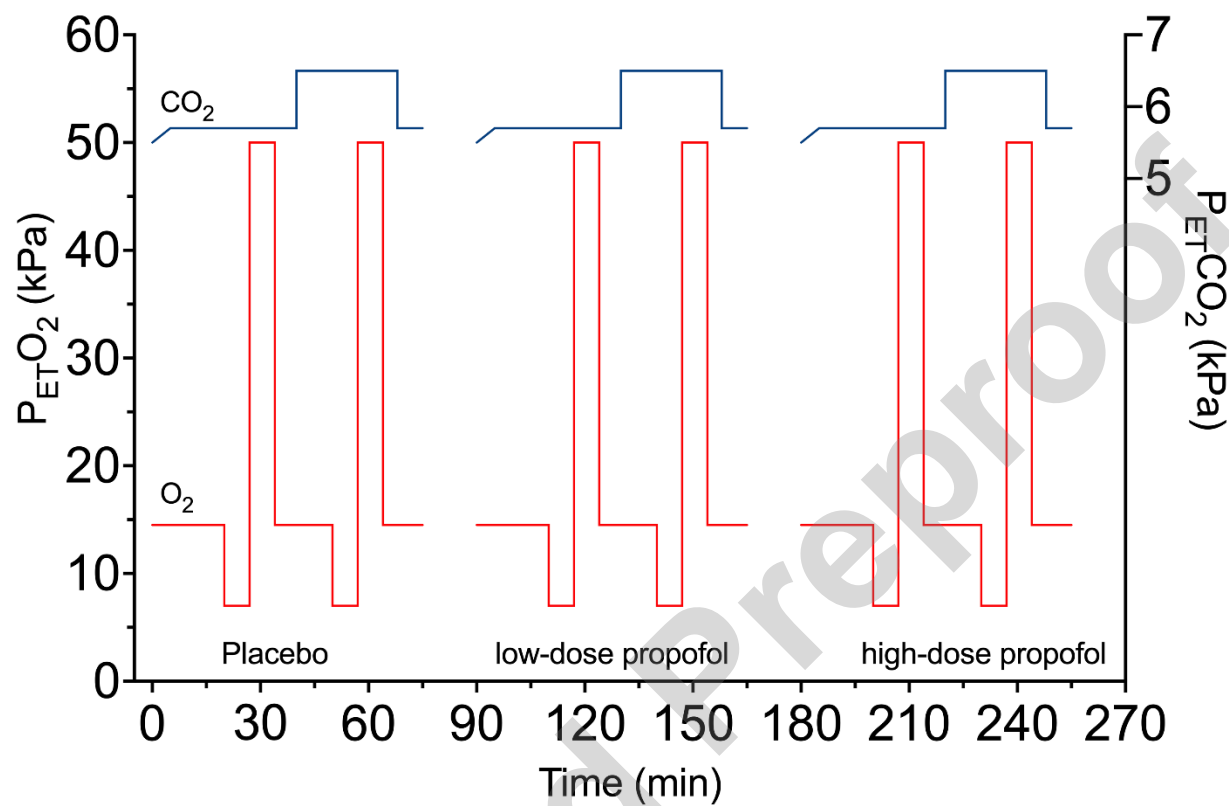

Figure 2

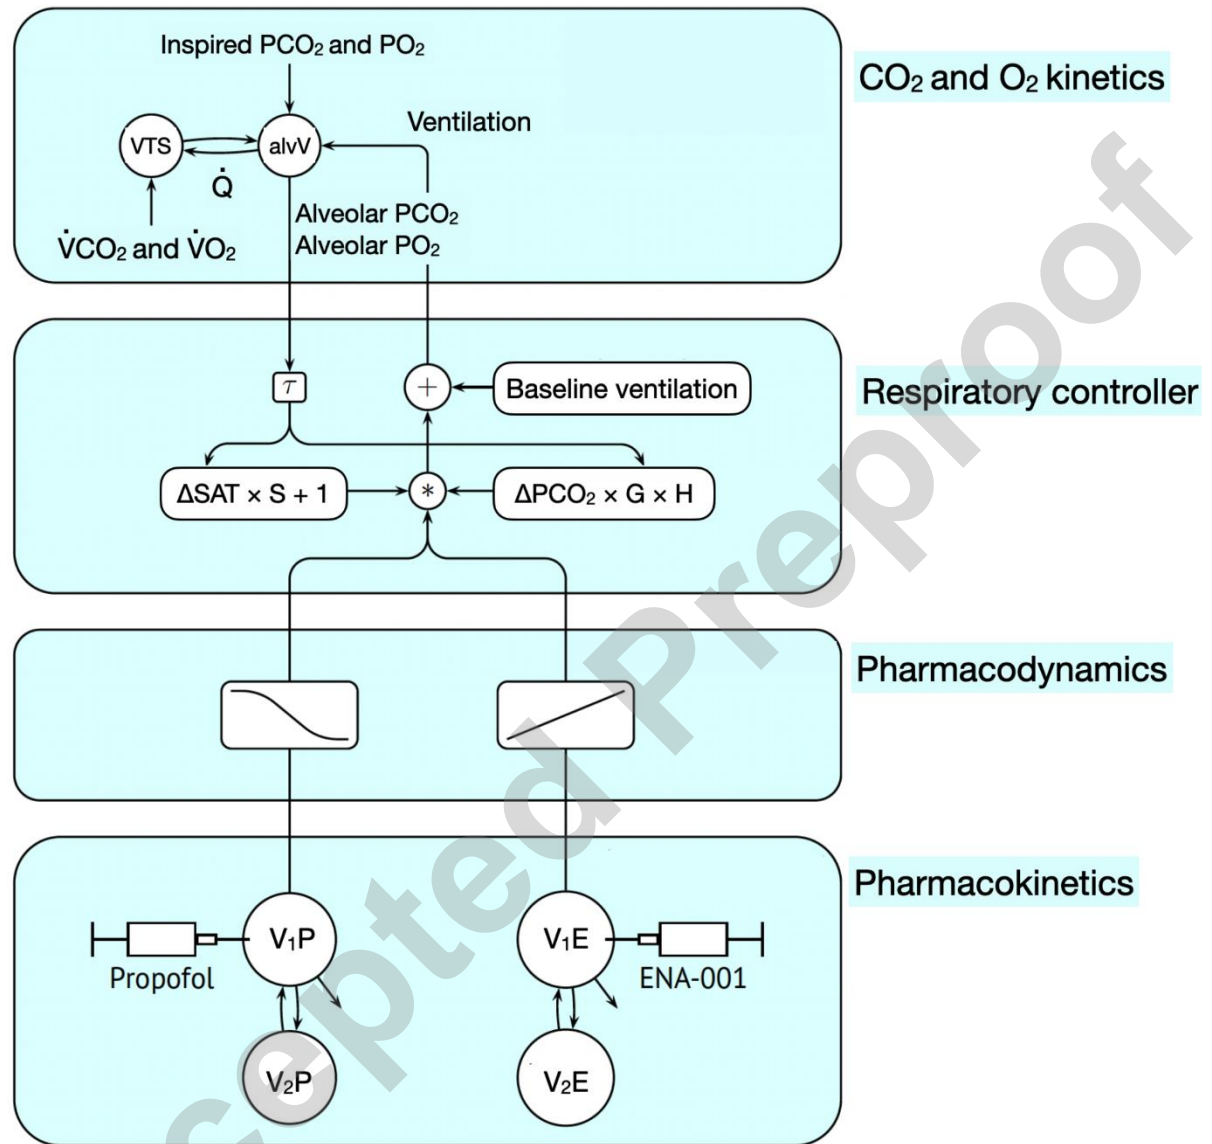



Figure 3

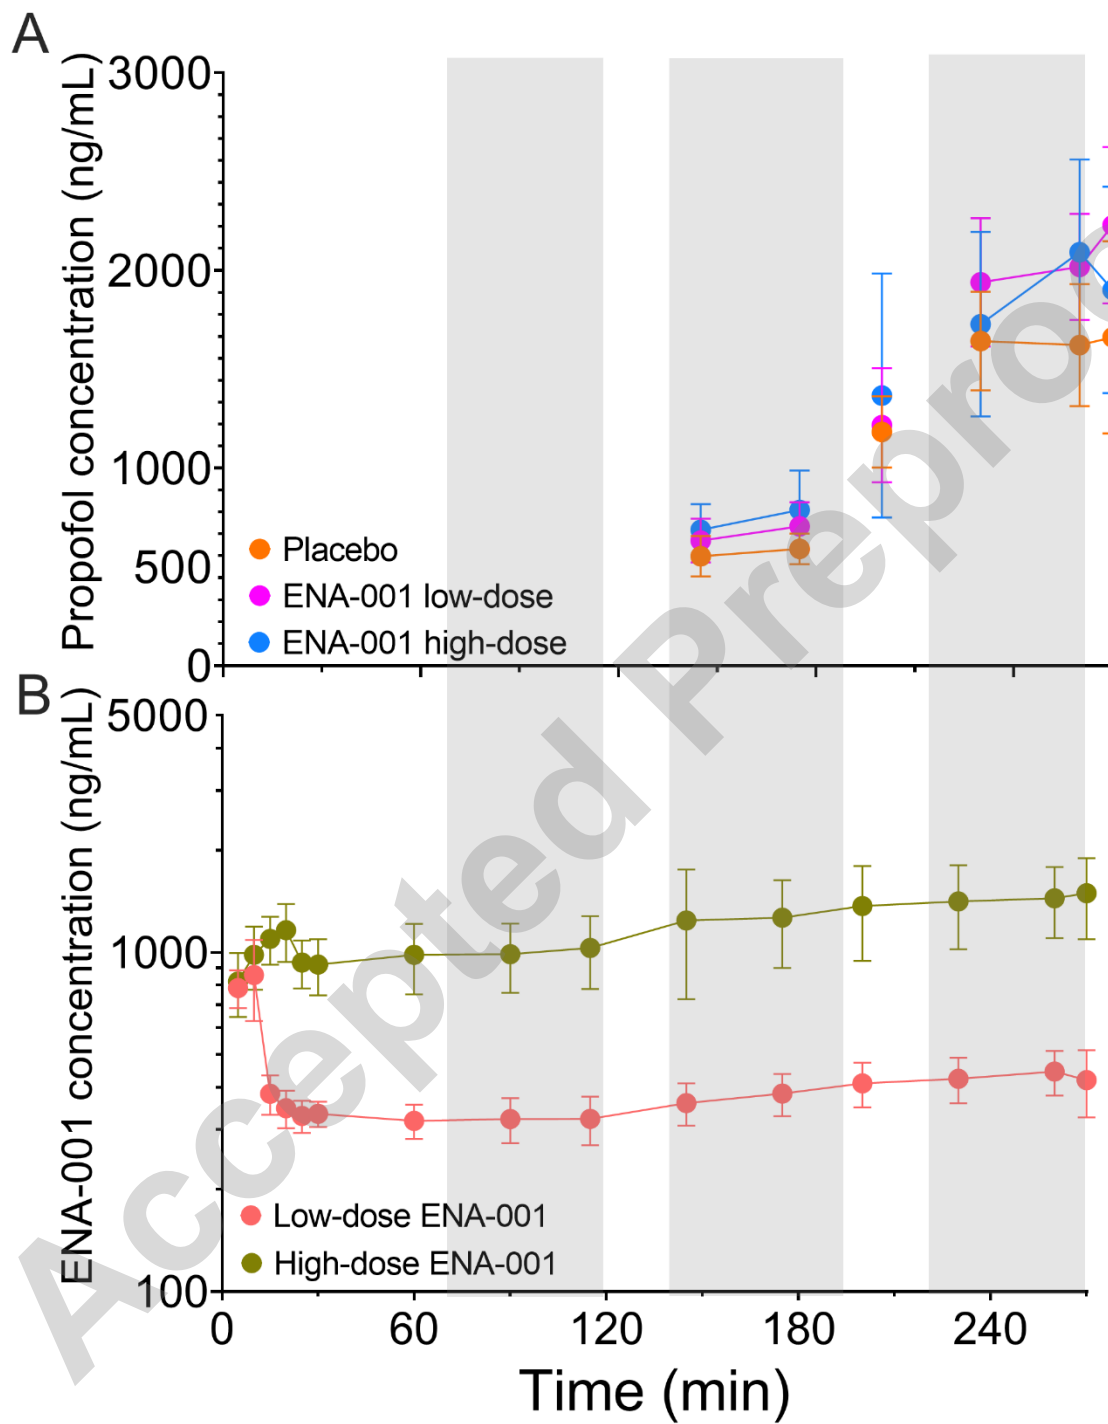

Figure 4

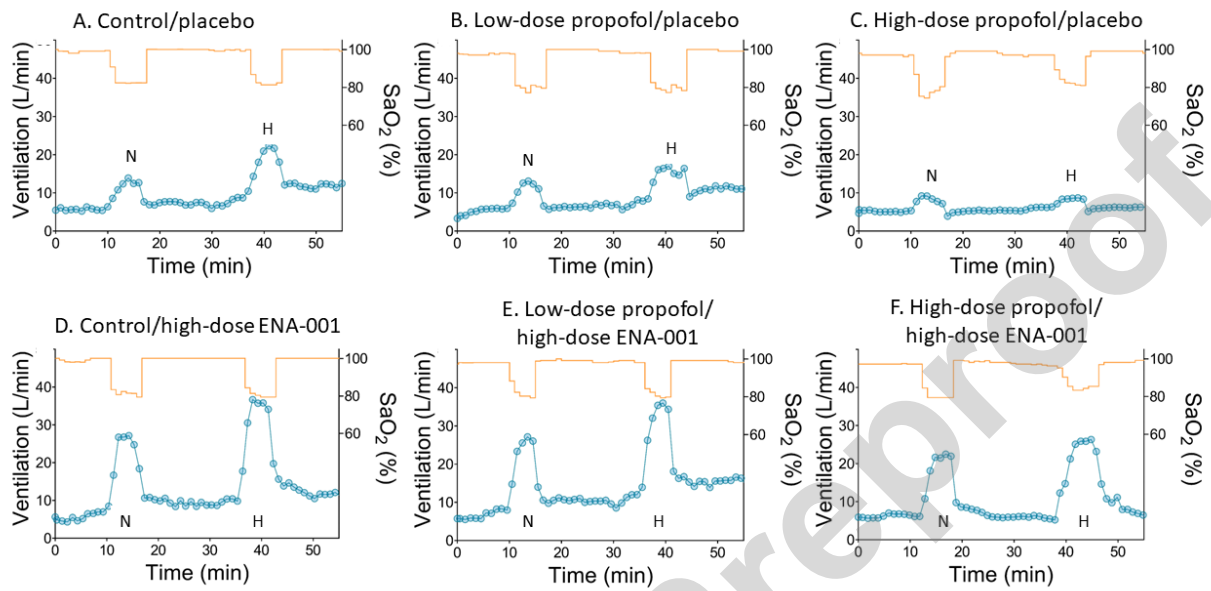

Figure 5

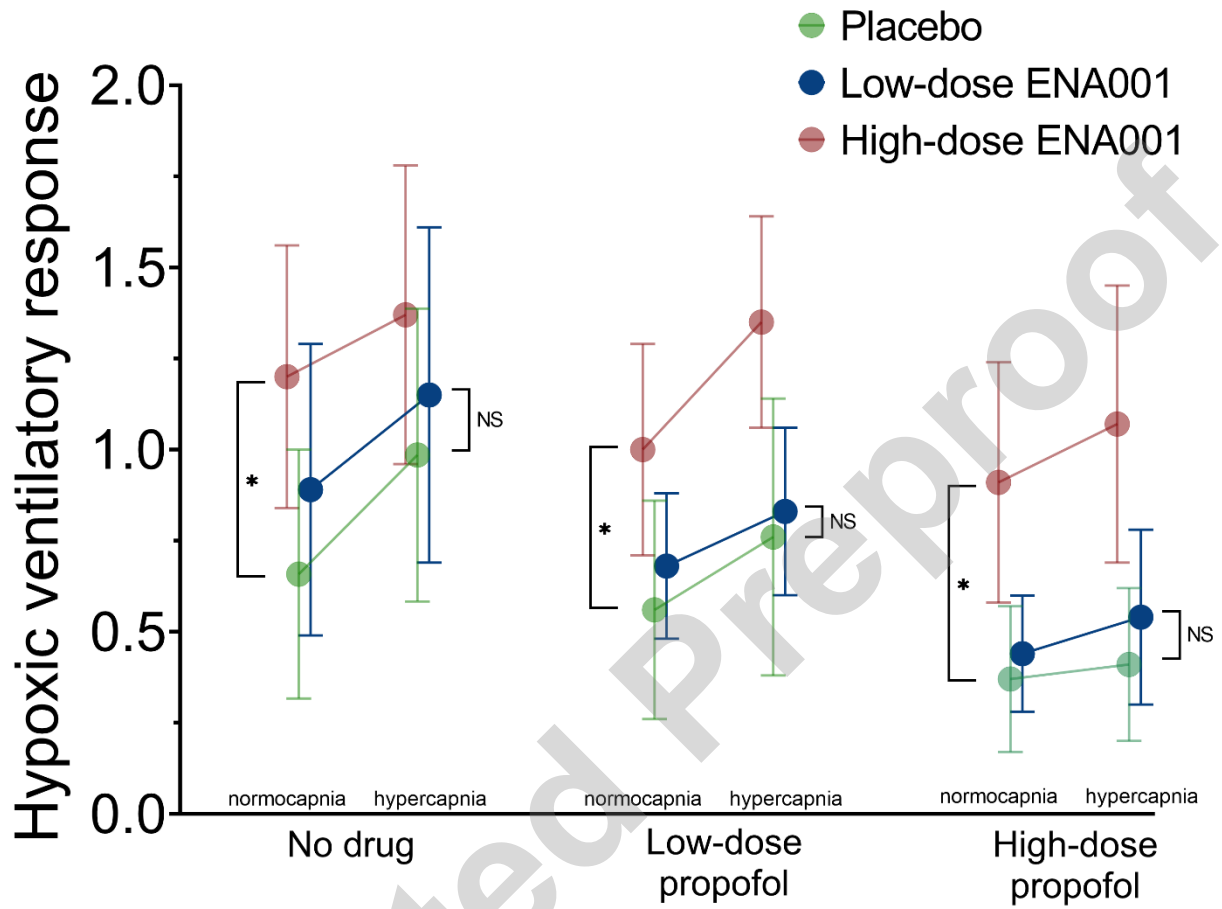

Figure 6

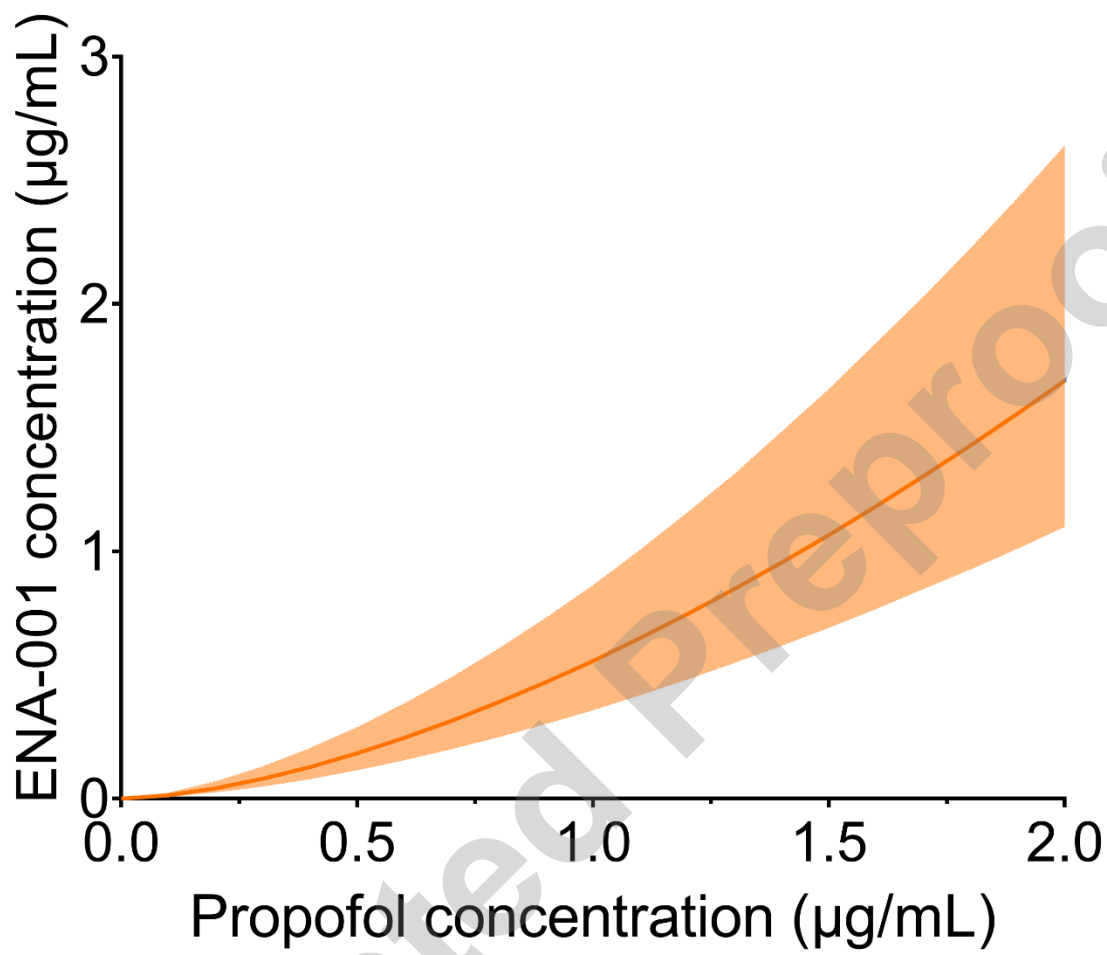

Source: https://asa2.silverchair.com/anesthesiology/article-pdf/doi/10.1097/ALN.0000000000004915/699793/aln.0000000000004915.pdf
